# Supplementary material
Source: PubMed Central journal article supplement (PMC6930342)
Supplement: NIHMS1054455-supplement-supp_info.pdf [file NIHMS1054455-supplement-supp_info.pdf]

## SUPPORTING INFORMATION

### Systematic quantification of the anion transport function of pendrin (SLC26A4) and its disease-associated variants

Koichiro Wasano, Satoe Takahashi, Samuel K. Rosenberg, Takashi Kojima, Hideki Mutai, Tatsuo Matsunaga, Kaoru Ogawa, and Kazuaki Homma

#### Contents

#### 1. Supplemental Figures (Pages: S1-S10)

- **Supp. Figure S1** (Page: S1)
- **Supp. Figure S2** (Page: S2)
- **Supp. Figure S3** (Pages: S3-S6)
- **Supp. Figure S4** (Page: S7)
- **Supp. Figure S5** (Pages: S8-S9)
- **Supp. Figure S6** (Page: S10)

#### 2. The DNA sequences of portions of the pendrin gene cloned in a pET01 vector (Pages: S11-S15)

#### 3. Supplemental Tables (Pages: S16-S18)

### 1. Supplemental Figures

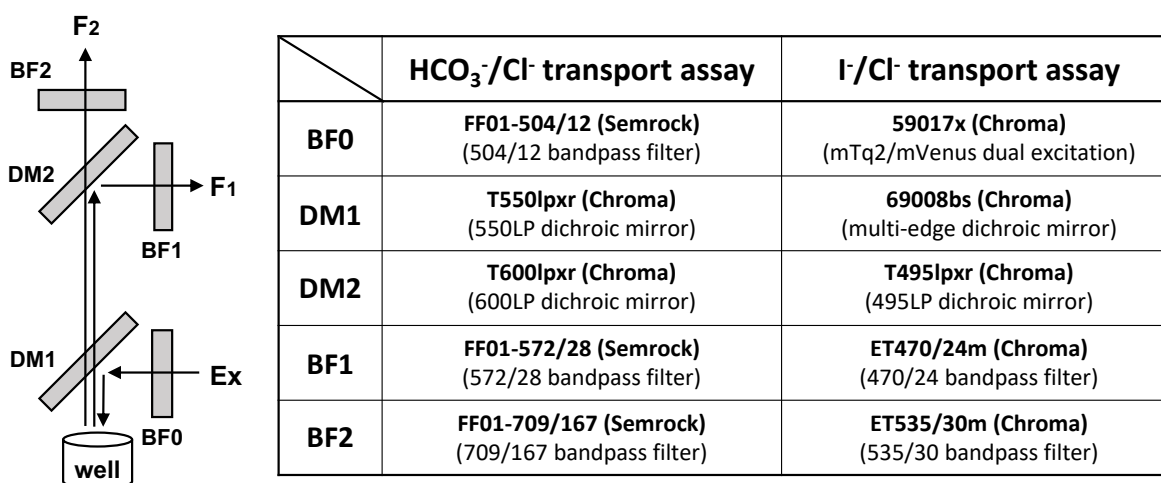

**Supp. Figure S1.** The optical configuration of the plate reader (Synergy Neo2) with a list of excitation/emission filters and dichroic mirrors used in this study.

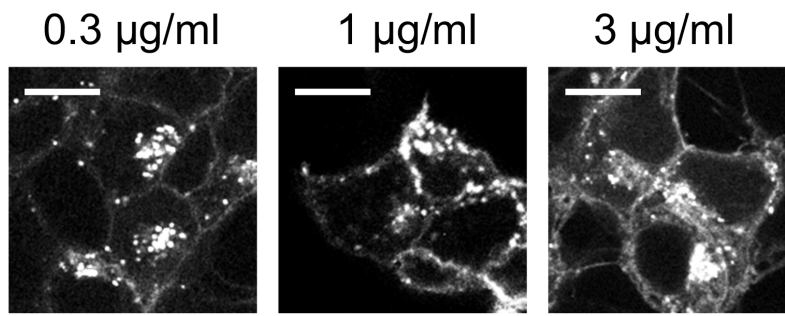

**Supp. Fig. S2.** HEK293T cells heterologously expressing WT-pendrin-mTq2. Fluorescence of mTq2 was imaged. The doxycycline dosage used are shown atop each image. The scale bars indicate 10 µm.

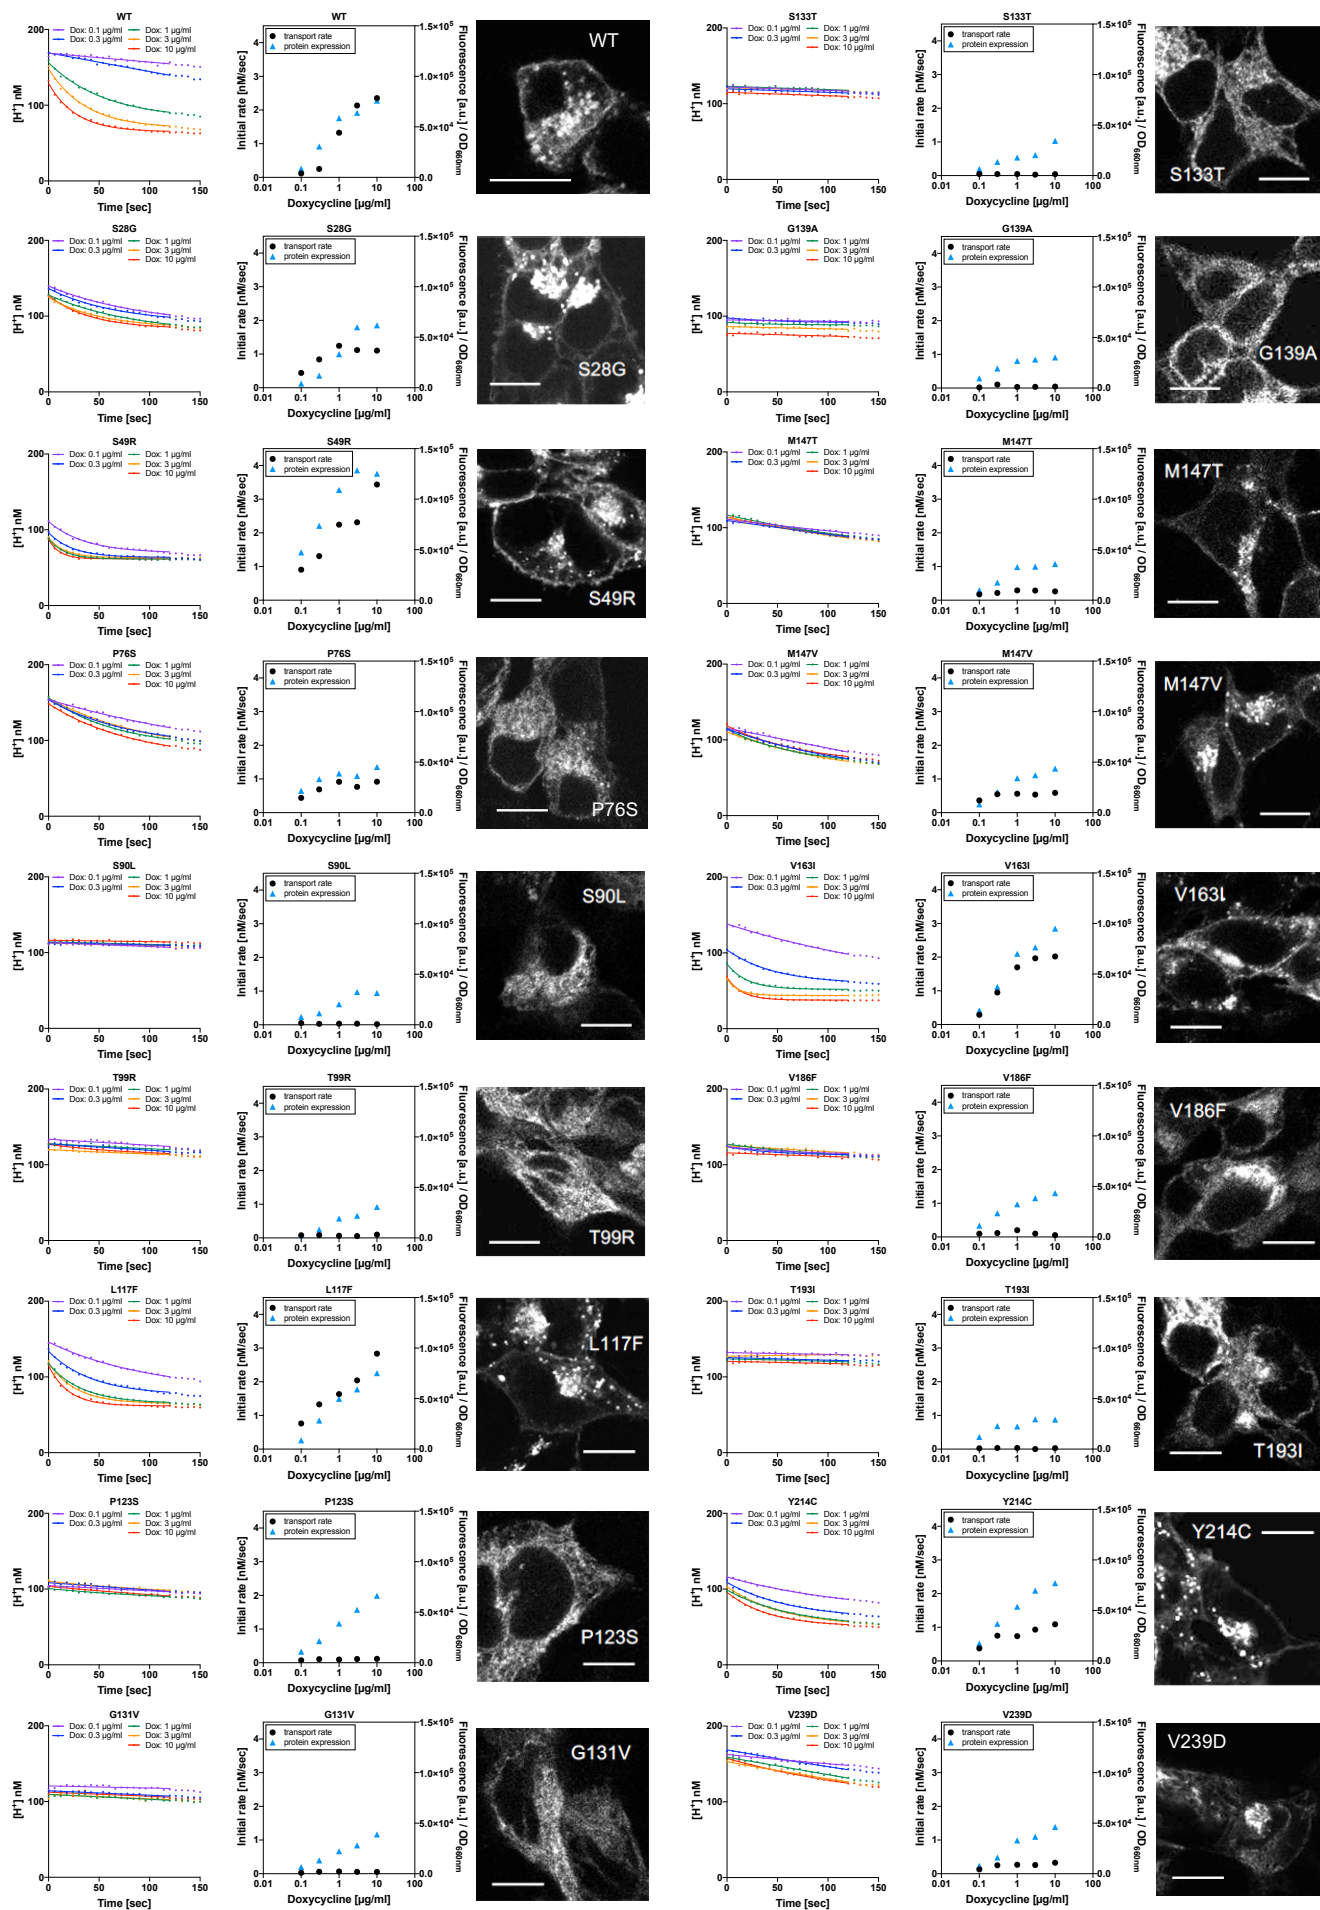

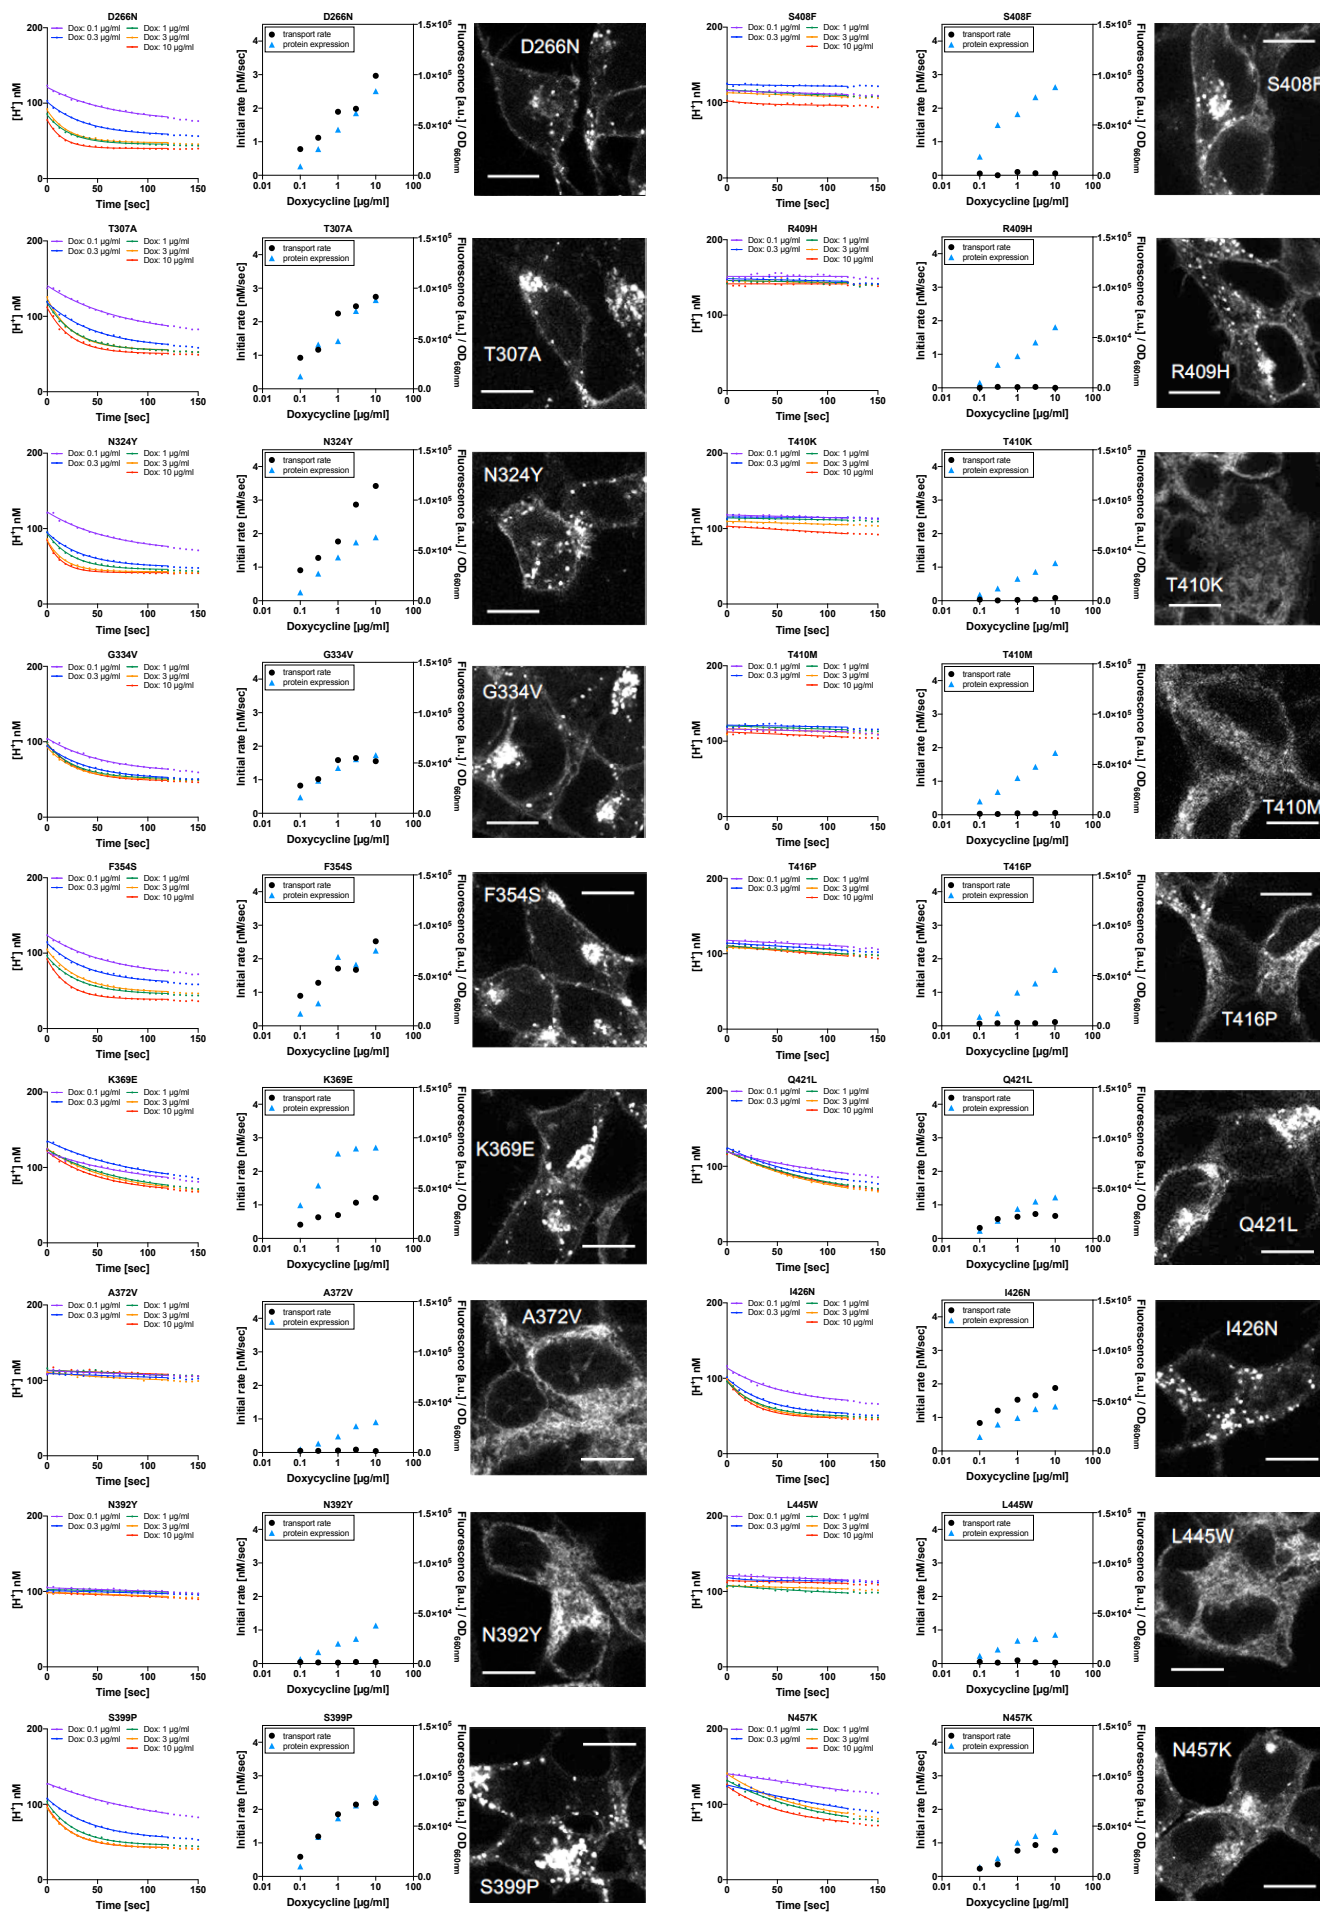

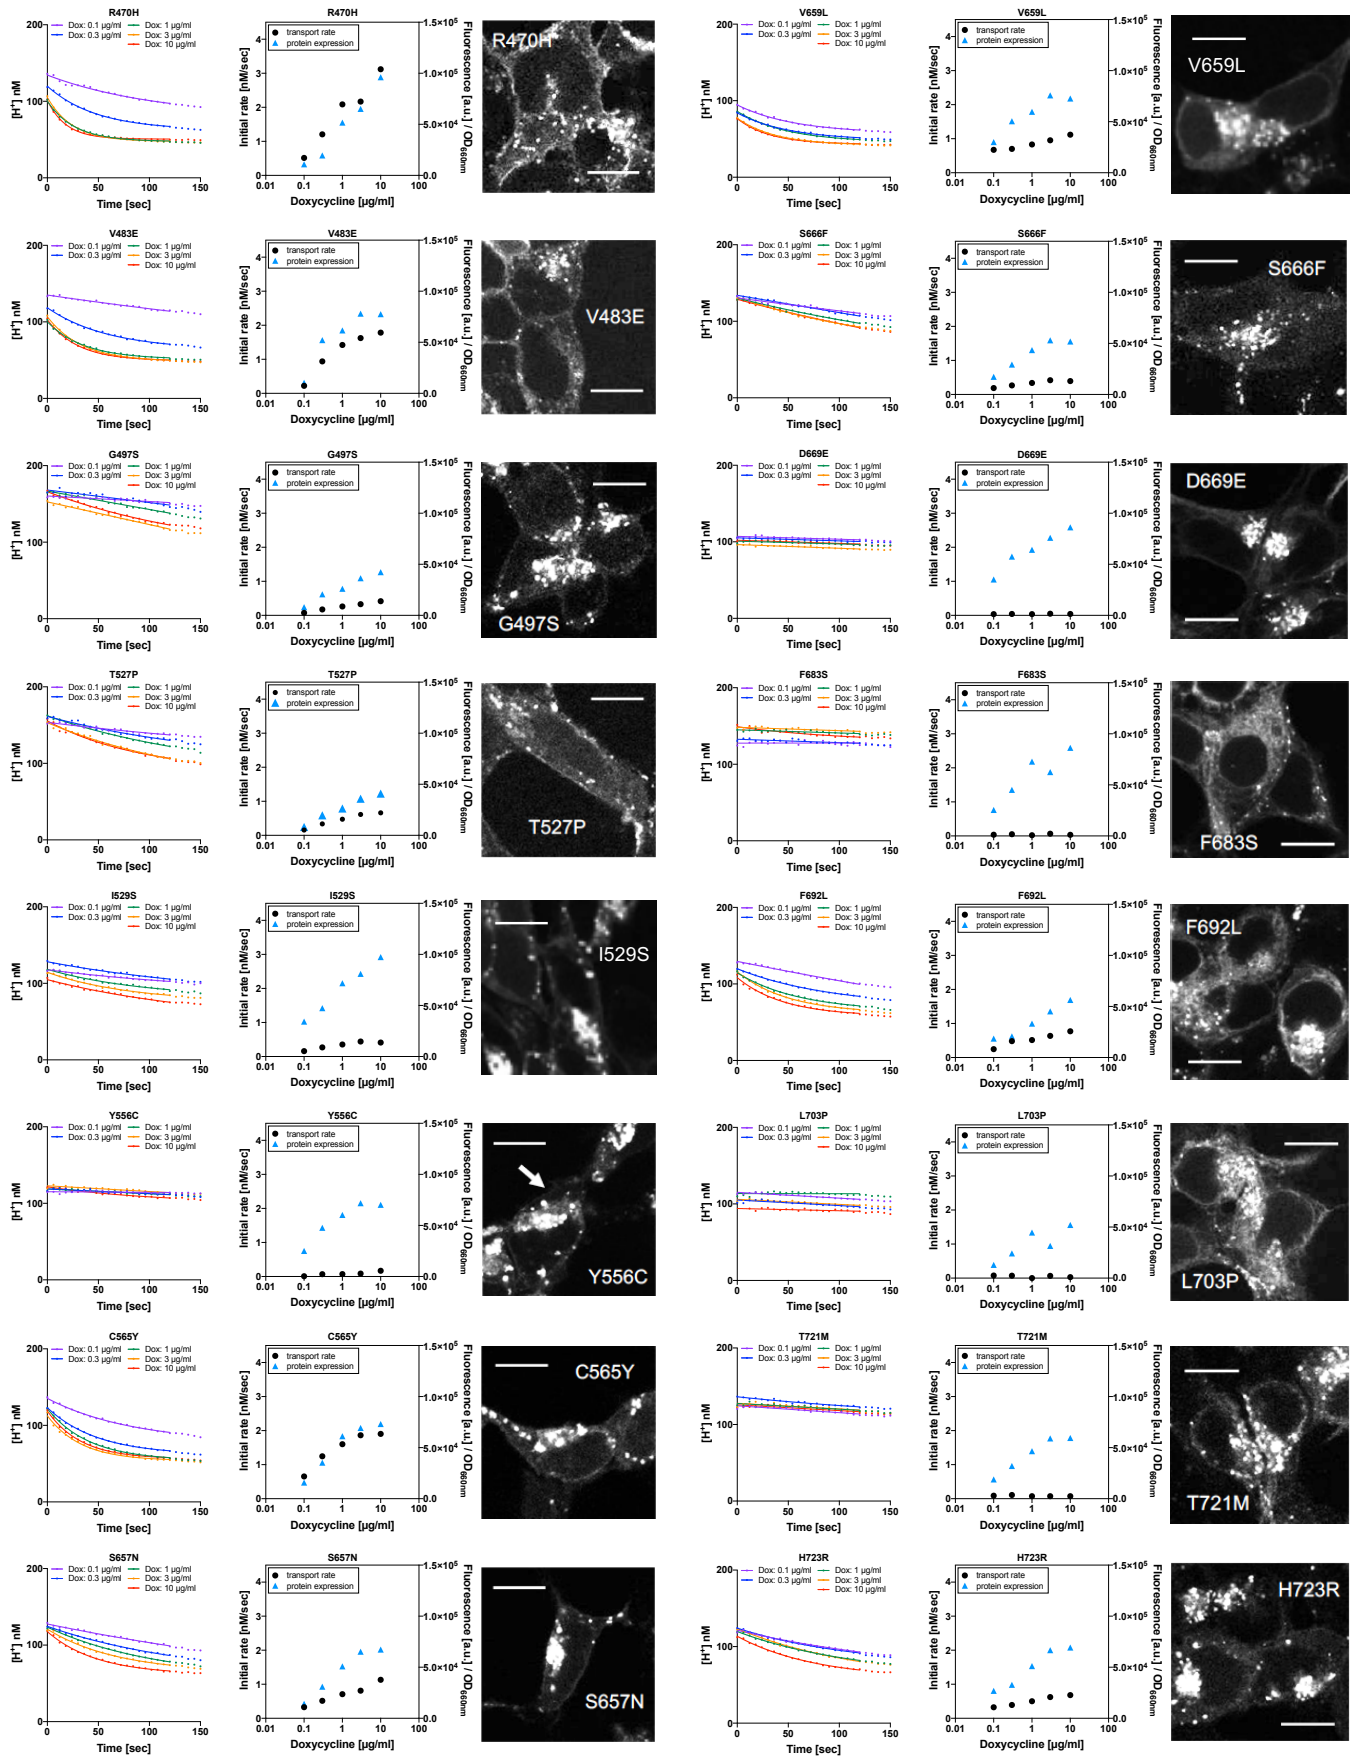

**Supp. Figure S3.** Representative examples of doxycycline dosage-dependent  $\text{HCO}_3^-/\text{Cl}^-$  antiport assay and fluorescence images of HEK293T cells expressing the mTq2-tagged pendrin constructs. Results of the transport assay are presented in the same way as in Figs. 2e and 2f. Scale bars indicate 10  $\mu\text{m}$ .



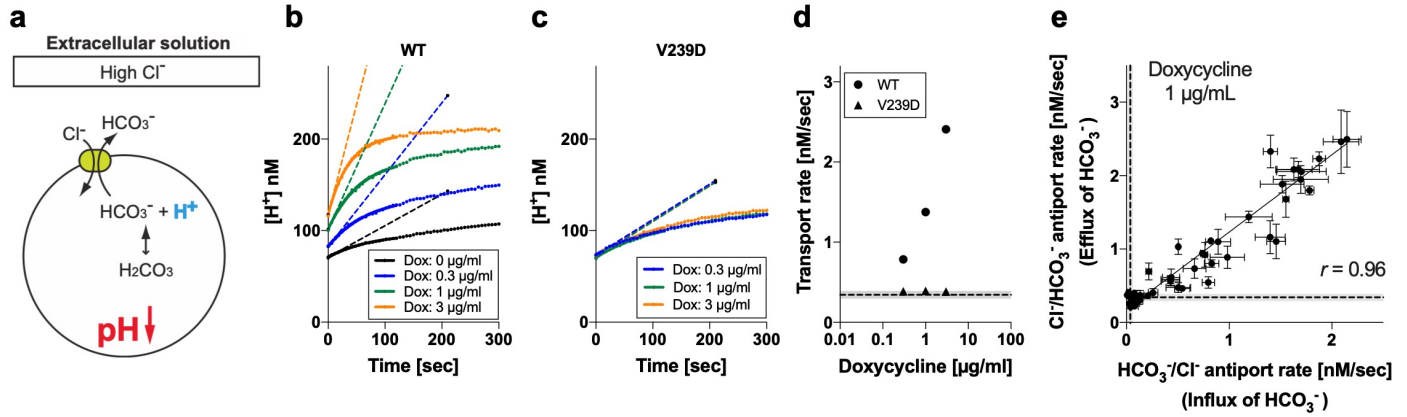

**Supp. Figure S4.**  $\text{HCO}_3^-/\text{Cl}^-$  antiport assay conducted under a high extracellular  $\text{Cl}^-$  condition. **(a)** An inward  $\text{Cl}^-$  gradient across the cell membrane drives pendrin-mediated efflux of  $\text{HCO}_3^-$ , which concomitantly decreases intracellular pH. **(b)** and **(c)** Examples of  $\text{HCO}_3^-/\text{Cl}^-$  antiport assay for WT- and V239D-pendrin-expressing cells, respectively. The broken lines indicate the initial rates. **(d)** Summaries of doxycycline dosage-dependent  $\text{HCO}_3^-/\text{Cl}^-$  antiport assay shown in panels **b** and **c**. The broken line indicates the basal transport rate determined for non-induced cells (negative control). **(e)** A comparison of  $\text{HCO}_3^-/\text{Cl}^-$  antiport rates measured by opposite  $\text{Cl}^-$  gradients (inward vs. outward) at 1  $\mu\text{g/ml}$  doxycycline. The error bars indicate the standard deviations. The solid line indicates Deming linear regression. The broken lines indicate the basal transport rates determined for non-induced cells ( $0.037 \pm 0.024$  nM/sec ( $n=5$ ) and  $0.34 \pm 0.05$  ( $n=9$ ) nM/sec for “Efflux of  $\text{HCO}_3^-$ ” and “Influx of  $\text{HCO}_3^-$ ”, respectively). This graph was generated using the numerical data shown in Table 1 ( $\text{HCO}_3^-/\text{Cl}^-$  antiport rates at 1  $\mu\text{g/ml}$  doxycycline) and Supp. Table S3.

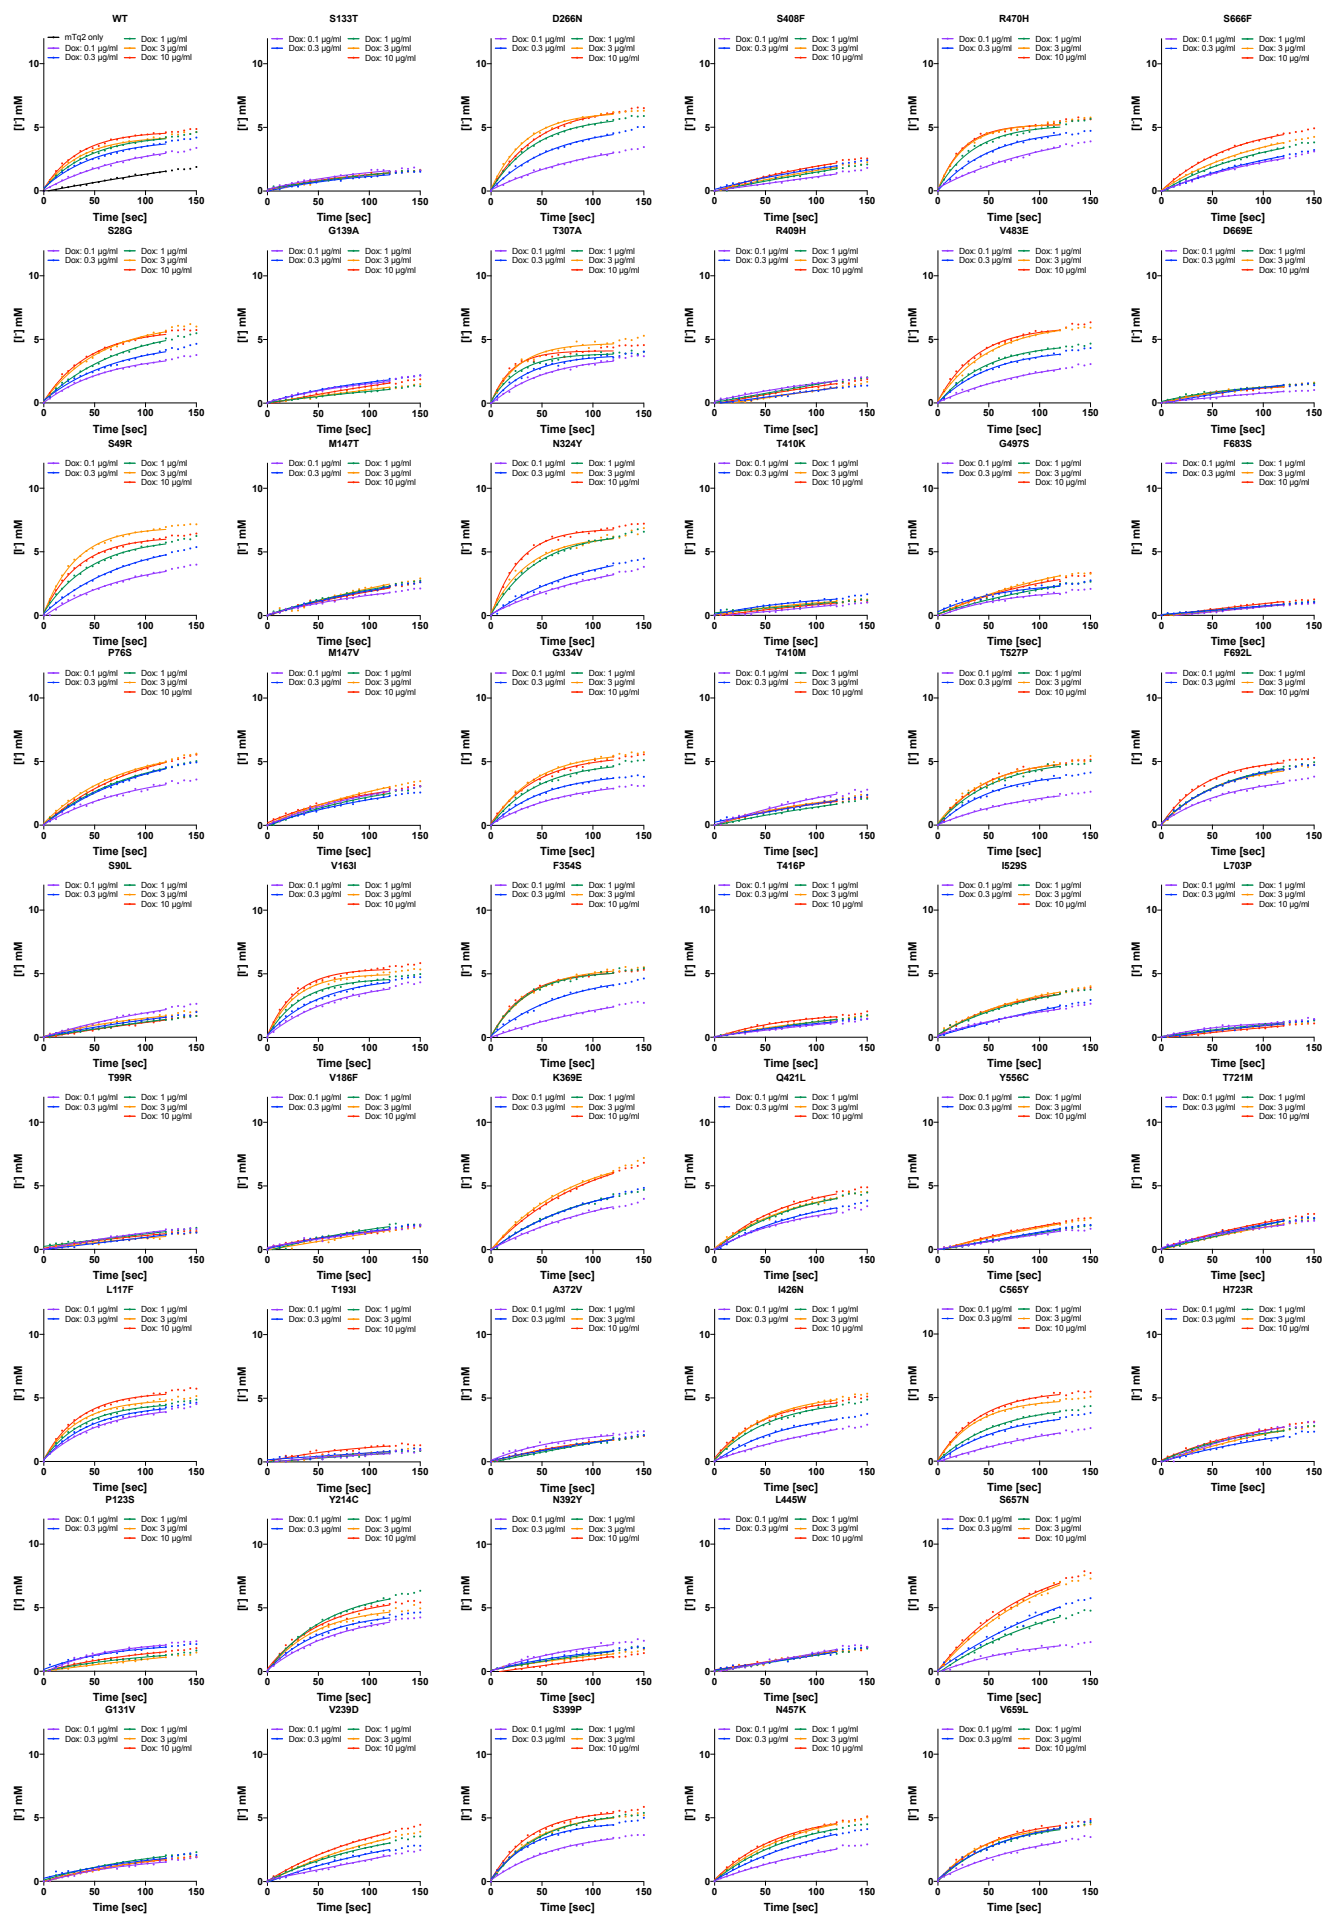



**Supp. Figure S5.** Representative examples of doxycycline dosage-dependent  $\Gamma/\text{Cl}^-$  antiport assay.

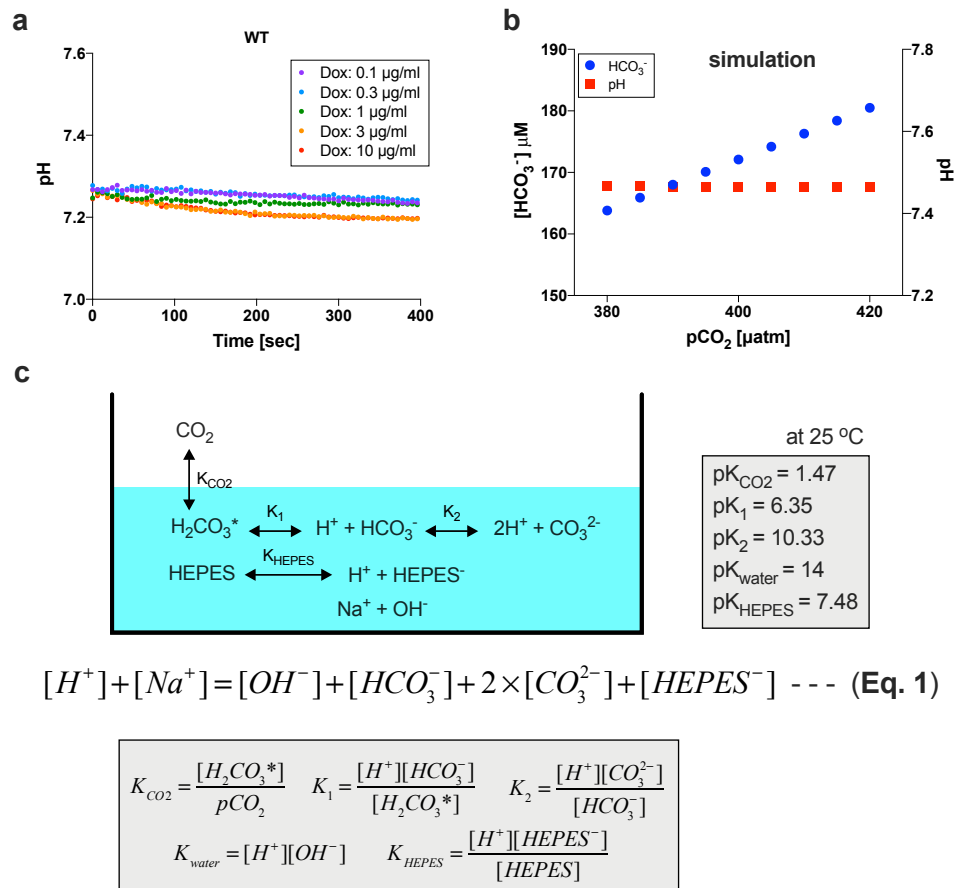

**Supp. Figure S6.** Change of pH during  $I^-/Cl^-$  antiport assay. **(a)** Measurement of intracellular pH of WT-pendrin-expressing cells during  $I^-/Cl^-$  antiport assay. **(b)** Estimation of  $HCO_3^-$  concentration in the solutions used for  $I^-/Cl^-$  antiport assay under various atmospheric  $CO_2$  conditions. The  $HCO_3^-$  concentration,  $[HCO_3^-]$ , was determined by numerically solving Eq. 1 shown in panel c using the equilibrium constants also shown in the panel. **(c)** A schematic representation of a solution containing carbonic acid, bicarbonate, and carbonate, which are in equilibrium with the atmospheric carbon dioxide.  $[H_2CO_3^*]$  denotes the equilibrium mixture of the aqueous carbon dioxide and carbonic acid. The solution also contains HEPES (20 mM) and NaOH (10 mM), which were added to adjust and maintain the solutions' pH at 7.5. This exercise shows that inclusion of pH buffer (20 mM HEPES-NaOH, pH 7.5) allows atmospheric  $CO_2$ -equilibrated  $HCO_3^-$  to reach  $\sim 170 \mu M$ , which would be sufficiently high to support the possibility raised in the main text that the small pH changes shown in panel A ( $\Delta[H^+] \approx 10 nM$ ) was due to efflux of endogenous  $HCO_3^-$  during  $I^-/Cl^-$  antiport assay.

## 2. The DNA sequences of portions of the pendrin gene cloned in a pET01 vector (splicing assay)

### PCR primers used

5' - CCTGGCCTGCCCAGGCTTTTGTCAACA - 3'

5' - CCACCTCCAGTGCCAAGGTCTGAAGGTCA - 3'

Gray highlights indicate the annealing sites of the primers shown above. The region within the pET01 vector that is spliced out is shown by gray characters. Portions of the pendrin gene used for the splicing assay are indicated by pale blue (intron sequences) and bold blue with underlines (exon sequences).

### ➤ Empty pET01 vector

(Expected size of the PCR product: 190-bp)

```
CCTGGCCTGCCCAGGCTTTTGTCAACAGCACCTTTGTGGTTCTCACTTGGTGGAAAGCTCTCTACCTGGTGTGTGGGGAGCGTGGATTCTTCTACACACC
CATGTCCCGCCGCGAAGTGGAGGACCCACAAGGTAAGCTCTGCTCCTGAATTAATTCATCCCAAGTGTAACTACCCTGTTTGTCTTTACCCCTTGAG
ACCTTGTAATAATTGTGCCCTAGGTGTGGAGGGTCTCAGGCTAACCAAGTGGGGGGCACATTTCTGTGGGCAGCTAGACATATGTAACATGGTAGCTGCCA
GGAAGGAGTGAGAATCCTTCCTTAAGTCTCCTAGGTGGTGACGGGTGGCTAGGCCCCAGGATAGGTACCGGGCCCCCCTCGAGGTGCAGCGTATCGAT
AAGCTAATTCCTGCAGCCCGGGGGATCCACTAGTTCFAGAGCGCCGCCACCCCGGTGGAGCTCGGTACCTATTTGGGGACCCCATAGAGCACTGCCTG
GACTAGGGATGGTAACAGGATGTGTAGGTTTGGAGGCCATATGTCCATTCATGACCAGTGTGTCTCACAGCCATGCAACCCCTGCCTCCTGTG
CTGACTTAGCAGGGGATAAAGTGAGAGAAAGCCTGGGCTAATCAGGGGGTGCCTCAGCTCCTCCTAACTGGATTGTCTATGTGTCTTTGCTTCTGTGC
TGCTGATGCTCTGCCCTGTGCTGACATGACCTCCCTGGCAGTGGCACAACCTGGAGCTGGGTGGAGGCCCGTGACCTTCAGACCTTGGCACTGGAGGTGG
```

### ➤ Exon2 of wild-type human pendrin

(Expected size of the PCR product: 190+167 = 357-bp)

```
CCTGGCCTGCCCAGGCTTTTGTCAACAGCACCTTTGTGGTTCTCACTTGGTGGAAAGCTCTCTACCTGGTGTGTGGGGAGCGTGGATTCTTCTACACACC
CATGTCCCGCCGCGAAGTGGAGGACCCACAAGGTAAGCTCTGCTCCTGAATTAATTCATCCCAAGTGTAACTACCCTGTTTGTCTTTACCCCTTGAG
ACCTTGTAATAATTGTGCCCTAGGTGTGGAGGGTCTCAGGCTAACCAAGTGGGGGGCACATTTCTGTGGGCAGCTAGACATATGTAACATGGTAGCTGCCA
GGAAGGAGTGAGAATCCTTCCTTAAGTCTCCTAGGTGGTGACGGGTGGCTAGGCCCCAGGATAGGTACCGGGCCCCCCTCGAGGTGCAGCGTATCGAT
CCAGACTCGCGGTGCAGGGGGGCCGGCTGCAGCTAACAGGTGATCCCGTTCTTTCTGTTCCTCGCTCTTCCCTCCGATCGTCTCGCTTACC CGGTG
TCTCCTCCTCGCTGTCTCTGGTCTCGAGTTCATGGCAGCGCCAGGCGGCGAGTTCGGAGCCGCGCAGCTCCCCGAGTACAGCTGCAGCTACATGGT
GTGCGGCGCGGTCTACAGCGAGCTCGCTTTCCAGCAACAGCAGCAGCGGCGCCTGCAGGAGCGCAAGACGCTCGCGGAGAGCCTGGCCAAGTGTCTCAG
GTAGCGGCGCGCGGGCCTGCGTAGAGAGAAGCGGAGCGGGGGCGTCCACGCCTTGGGGAGGGAAGGGCGTCCCAGCGGGCGAGAGTGGGGTGCGGGGC
GCGGAGCCCCGGGCGCAGCTGCTTCTCCAGAGGCCCGACTTTCGGTCTTCGAGGTTCGACGGTATCGATAAGCTAATTCCTGCAGCCCGGGGATCCACTAGTTC
ACTAGTTCFAGAGCGGCCGCCACCCGGTGGAGCTCGGTACCTAATTTGGGGACCCCATAGAGCACTGCCTGACTGAGGGATGGTAACAGGATGTGTAG
GTTTTGGAGGCCCATATGTCCATTCATGACCAGTGTGTCTCACAGCCATGCAACCCCTGCCTCCTGTGCTGACTTAGCAGGGGATAAAGTGAGAGA
AAGCCTGGGCTAATCAGGGGGTGCCTCAGCTCCTCCTAACTGGATTGTCTATGTGTCTTTGCTTCTGTGCTGCTGATGCTCTGCCCTGTGCTGACATG
ACCTCCCTGGCAGTGGCACAACCTGGAGCTGGGTGGAGGCCCGTGACCTTCAGACCTTGGCACTGGAGGTGG
```

### ➤ Exon3 of wild-type human pendrin

(Expected size of the PCR product: 190+140 = 330-bp)

```
CCTGGCCTGCCCAGGCTTTTGTCAACAGCACCTTTGTGGTTCTCACTTGGTGGAAAGCTCTCTACCTGGTGTGTGGGGAGCGTGGATTCTTCTACACACC
CATGTCCCGCCGCGAAGTGGAGGACCCACAAGGTAAGCTCTGCTCCTGAATTAATTCATCCCAAGTGTAACTACCCTGTTTGTCTTTACCCCTTGAG
ACCTTGTAATAATTGTGCCCTAGGTGTGGAGGGTCTCAGGCTAACCAAGTGGGGGGCACATTTCTGTGGGCAGCTAGACATATGTAACATGGTAGCTGCCA
GGAAGGAGTGAGAATCCTTCCTTAAGTCTCCTAGGTGGTGACGGGTGGCTAGGCCCCAGGATAGGTACCGGGCCCCCCTAGCACTTCAGGGTTATTATT
TTCCAGGAAATACTTATCCTTTTTCCAAATAGTTATAAACATCAGCAGAATCCAGTTCATAACTTTGTGATTTGCAAATTTGGTTGTGACTGAGATTGGA
TTGAAAACCCAGTTTTCTTGCTTTTGGACAGTTGTTCAAGAAAGAGAGCCTTTGGTGTGCTAAAGACTCTTGTGCCATCTTGGAGTGGCTCCCCAAAT
ACCGAGTCAAGGAATGGCTGCTTAGTGACGTCAATTCGGGAGTTAGTACTGGGCTAGTGGCCACGCTGCAAGGTAAGATGTTGGCAGATTGAGAGTCTT
GGTCTCCAGCAGGAGTTTAAACACTTCTCCCAGCTACCATAGGTCTGTGACAGATGGTGTCTTACCCTTCAAGGCCGTGATCTTTCTGTAGAGCCCCCT
TAGTGGAGAGAGTCACTCTCTTCGAGGTTCGACGGTATCGATAAGCTAATTCCTGCAGCCCGGGGATCCACTAGTTCFAGAGCGGCCGCCACCCGG
GTGGAGTCTCGGTACCTATTTGGGGACCCCATAGAGCACTGCCTGACTGAGGGATGGTAACAGGATGTGTAGGTTTGGAGGCCCATATGTCCATTCAT
GACCAGTACTTGTCTCACAGCCATGCAACCCCTGCCTCCTGTGCTGACTTAGCAGGGGATAAAGTGAGAGAAAGCCTGGGCTAATCAGGGGGTGCCTC
AGCTCCTCCTAACTGGATTGTCTATGTGTCTTTGCTTCTGTGCTGCTGATGCTCTGCCCTGTGCTGACATGACCTCCCTGGCAGTGGCACAACCTGGAG
CTGGGTGGAGGCCCGTGACCTTCAGACCTTGGCACTGGAGGTGG
```

### ➤ Exon4 of wild-type human pendrin

(Expected size of the PCR product: 190+111 = 301-bp)

```
CCTGGCCTGCCCAGGCTTTTGTCAACAGCACCTTTGTGGTTCTCACTTGGTGGAAAGCTCTCTACCTGGTGTGTGGGGAGCGTGGATTCTTCTACACACC
CATGTCCCGCCGCGAAGTGGAGGACCCACAAGGTAAGCTCTGCTCCTGAATTAATTCATCCCAAGTGTAACTACCCTGTTTGTCTTTACCCCTTGAG
```

ACCTTGTAATAATTGTGCCCTAGGTGTGGAGGGTCTCAGGCTAACAGTGGGGGGCACATTTCTGTGGGCAGCTAGACATATGTAACATGGTAGCTGCCA  
 GGAAGGAGTGAGAATCCTTCCTTAAGTCTCCTAGGTGGTGACGGGTGGCTAGGCCCCAGGATAGGTACCGGGCCCCCCCCGTTACTTAAAGTATGGTTT  
 CTACTGAATGCATATTCCTTTTGCATCATATAAAGGCAAAGTCAATAAGTGAACCATTTGTAAGTTGAGGACTTTCTGCATACCTGAACCTTTGGTTGT  
 GAATGTAATCACCTTTGCATGTGCTTTCAGGGATGGCATATGCCCTACTAGCTGCAGTTCCTGTCCGGATATGGTCTCTACTCTGCTTTTTTCCCTATCCT  
 GACATACTTTATCTTTGGAACATCAAGACATATCTCAGTTGGTAATATAAGTATATTTACAATTATATTTGCTCATGTTTAAAGTGTTTTGGCTATA  
 TTAAGTGCATTATACCTCTATTAGGTGGTGCAAAAGTAATTGCCGTTTTCACAATTATACTTTTAATTGTGAAAACCGCAATTACTCGAGGTCGACGG  
 TATCGATAAGCTAATTCCTGCAGCCCGGGGATCCACTAGTTCCTAGAGCGGCCGCCACCGCGGTGGAGCTCGGTACCTATTTGGGGACCCCATAGAGCA  
 CTGCACTGACTGAGGGATGGTAACAGGATGTGTAGGTTTGGAGGCCATATGTCCATTCATGACCAGTGAATGTCTCACAGCCATGCAACCCCTGGC  
 TCCTGTGCTGACTTAGCAGGGGATAAAGTGAGAGAAAGCCTGGGCTAATCAGGGGGTCGCTCAGCTCCTCCTAACTGGATTGTCTATGTGTCTTTGCT  
 TCTGTGCTGCTGATGCTCTGCCCTGTGCTGACATGACCTCCCTGGCAGTGGCACAACCTGGAGCTGGGTGGAGGCCCGTGACCTTCAGACCTTGGCACTG  
 GAGGTGG

### ➤ Exon5 of wild-type human pendrin

(Expected size of the PCR product: 190+185 = 375-bp)

CCTGGCCTGCCAGGCTTTTGTCAACAGCACCTTTGTGGTTCCTACTTGGTGAAGCTCTCTACCTGGTGTGTGGGAGCGTGGATTCTTCTACACACC  
 CATGTCCCGCCGCAAGTGGAGGACCCACAAGGTAAGCTCTGCTCCTGAATTAATTCATCCCAAGTGTAACTACCCTGTTTGTCTTTACCCCTTGAG  
 ACCTTGTAATAATTGTGCCCTAGGTGTGGAGGGTCTCAGGCTAACAGTGGGGGGCACATTTCTGTGGGCAGCTAGACATATGTAACATGGTAGCTGCCA  
 GGAAGGAGTGAGAATCCTTCCTTAAGTCTCCTAGGTGGTGACGGGTGGCTAGGCCCCAGGATAGGTACCGGGCCCCCCCCAGCCACTGGGTCCGGCTCAG  
 CTTCTTTCTGTGAACAAAATAATTTTCTAGTCACAGCTAAATCTTTTATACATTTTAAACCCATGACAGACACATTGAACATTTGTGATTAATAAC  
 TGATTAATTTGTAGAGACTTTTTTCCCCAGGACCTTTCCAGTGGTGGTAAATGGTGGGATCTGTGTTCTGAGCATGGCCCCGACGAACACTTT  
 CTCGTATCCAGCAGCAATGGAACGTATTAATACTACTATGATAGACACTGCAGCTAGAGATACAGCTAGAGTCCCTGATTGCCAGTGCCTGACTCTG  
 CTGGTTGGAATTATACAGGTAATGAACTTACAAGTAAAATATAGATGGATGTAATTTTATTTGAAATTAACCTTTAAAGCATATAGACTTAAAGATTCT  
 ACTAAAAACAAAACAAAGTAATTTCTTGAACCCAAAATATTTTCTAAATTACGTTGTTTGTAGTCTGAGGTCGACGGTATCGATAAGCTAATTC  
 CTGCAGCCCGGGGATCCACTAGTTCCTAGAGCGGCCGCCACCGCGGTGGAGCTCGGTACCTATTTGGGGACCCCATAGAGCACTGCACTGACTGAGGGA  
 TGGTAACAGGATGTGTAGGTTTGGAGGCCATATGTCCATTCATGACCAGTGAATGTCTCACAGCCATGCAACCCCTGGCTCCGTGTGCTGACTTAGC  
 AGGGGATAAAGTGAGAGAAAGCCTGGGCTAATCAGGGGGTCGCTCAGCTCCTCCTAACTGGATTGTCTATGTGCTTTGCTTCTGTGCTGATGCT  
 CTGCCCTGTGCTGACATGACCTCCCTGGCAGTGGCACAACCTGGAGCTGGGTGGAGGCCCGTGACCTTCAGACCTTGGCACTGGAGGTGG

### ➤ Exon6 of wild-type human pendrin

(Expected size of the PCR product: 190+165 = 355-bp)

CCTGGCCTGCCAGGCTTTTGTCAACAGCACCTTTGTGGTTCCTACTTGGTGAAGCTCTCTACCTGGTGTGTGGGAGCGTGGATTCTTCTACACACC  
 CATGTCCCGCCGCAAGTGGAGGACCCACAAGGTAAGCTCTGCTCCTGAATTAATTCATCCCAAGTGTAACTACCCTGTTTGTCTTTACCCCTTGAG  
 ACCTTGTAATAATTGTGCCCTAGGTGTGGAGGGTCTCAGGCTAACAGTGGGGGGCACATTTCTGTGGGCAGCTAGACATATGTAACATGGTAGCTGCCA  
 GGAAGGAGTGAGAATCCTTCCTTAAGTCTCCTAGGTGGTGACGGGTGGCTAGGCCCCAGGATAGGTACCGGGCCCCCCCCAAGAAATTCATATTTTTC  
 TACCAGTATTTTGTGCTATAGGCAGGCTACTAGTGTTTTCACTGGTATTAAGCTGTATATTTCCAGAGAGTAGGTTTCTATCTCAGGCAAAACA  
 TTTAATTTTCTTTCCCTTTTCTTATCGTAGTTGATATTTGGTGGCTTGCAGATTGGATTTCATAGTGGAGTCTTGGCAGTCCCTTTGGTTGGTGGCT  
 CACAACAGCTGCTGCCCTTCCAAGTGTGGTCTCACAGCTAAAGATTGTCTCAATGTTTCAACCAAAAACACTACAATGGAGTCTCTCTATTATCTATGT  
 AAGTGTGCTTCTTGTCCAGGGATGGGTCACTGTTTCCAGAAACAATTGTATTCATTCTCTGAGTCTGGGCCAGGCGTGGTGGCTCACACCTGTA  
 ATCCAGCACTTTGGAAGGCCGAGTGGGCAGATTGCTTGAGCCAGGATCGAGGTCGACGGTATCGATAAGCTAATTCCTGCAGCCCGGGGATCCAC  
 TAGTTCAGAGCGGCCGCCACCGCGGTGGAGCTCGGTACCTATTTGGGGACCCCATAGAGCACTGCACTGACTGAGGGATGGTAACAGGATGTGTAGGT  
 TTTGGAGCCCATATGTCCTTACAGCAGTGAATGCTGCACAGCCATGCAACCCCTGGCTTCTGCTGACTTACAGGGGATAAAGTGAGAGAAA  
 GCCTGGGCTAATCAGGGGTCGCTCAGCTCCTCCTAACTGGATTGTCTATGTGCTTTGCTTCTGTGCTGCTGACTGACTCTGCCCTGTGCTGACATGAC  
 CTCCCTGGCAGTGGCACAACCTGGAGCTGGGTGGAGGCCCGTGACCTTCAGACCTTGGCACTGGAGGTGG

### ➤ Exon7 and exon8 of wild-type human pendrin

(Expected size of the PCR product: 190+153+83 = 426-bp)

CCTGGCCTGCCAGGCTTTTGTCAACAGCACCTTTGTGGTTCCTACTTGGTGAAGCTCTCTACCTGGTGTGTGGGAGCGTGGATTCTTCTACACACC  
 CATGTCCCGCCGCAAGTGGAGGACCCACAAGGTAAGCTCTGCTCCTGAATTAATTCATCCCAAGTGTAACTACCCTGTTTGTCTTTACCCCTTGAG  
 ACCTTGTAATAATTGTGCCCTAGGTGTGGAGGGTCTCAGGCTAACAGTGGGGGGCACATTTCTGTGGGCAGCTAGACATATGTAACATGGTAGCTGCCA  
 GGAAGGAGTGAGAATCCTTCCTTAAGTCTCCTAGGTGGTGACGGGTGGCTAGGCCCCAGGATAGGTACCGGGCCCCCCCCTTACTGAAACTTTTGTGATGT  
 TGTGTTGATGCTGATATCATGGTTTTTTCATGTGGGAAGATTATATGAGAATTGATTGTGTGTGTGTGCGTGTGTGTGTGCTCGTGTGCGTGTAGCAGCA  
 GGAAGTATATAAAAATATTTCTTTTATAGACGCTGGTTGAGATTTTCAAATATTTGGTGATACCAATCTTGTGATTTCACTGCTGGATTGCTCAC  
 CATTGTCGCTGTATGGCAGTTAAGGAATTAATGATCGGTTTGGACACAAAATCCAGTCCCTATTCCTATAGAGTAATTGTGTAAGTAGAATATG  
 TAGTTAGAAAAGTTCAGCATTATTTGGTTGACAAAACAAGGAATTAATAAAACCAATGGAGTTTTTAACATCTTTTGTTTTATTTTCAACGATAATTGCTA  
 CTGCCATTTCATATGGAGCAACCTGGAAAAAATACAATGCTGGCATTGTTAAATCCATCCCAAGGGGTGAGTGTGGTGTCCCTCTTAGTACTAAT  
 ACATTAAGTCAGTAAGTCAGTCTTTTATTTAAATAAAACCTTTTATTAACAAGCTTCAATTCATGATACTGATCTCAATAGTCCATTTGTGTGATGAT  
 CTGGAAGAAAACAACCATAAAGACTCAGAGTGCAGCGTATCGATAAGCTAATTCCTGCAGCCCGGGGATCCACTAGTTCCTAGAGCGGCCGCCACCGCGGT  
 GGAGCTCGGTACCTATTTGGGGACCCCATAGAGCACTGCACTGACTGAGGGATGGTAACAGGATGTGTAGGTTTGGAGGCCCATATGTCCATTCATGA  
 CCAGTGAATTTGTCTCACAGCCATGCAACCCCTGGCTCCTGTGCTGACTTAGCAGGGGATAAAGTGAGAGAAAGCCTGGGCTAATCAGGGGGTCGCTCAG  
 CTCTCCTAACTGGATTGTCTATGTGCTTTGCTTCTGTGCTGCTGATGCTCTGCCCTGTGCTGACATGACCTCCCTGGCAGTGGCACAACCTGGAGCT  
 GGGTGGAGGCCCGTGACCTTCAGACCTTGGCACTGGAGGTGG



TGCCCTCTGTGCTGACTTAGCAGGGGATAAAGTGAGAGAAAGCCTGGGCTAATCAGGGGGTCGCTCAGCTCCTCCTAACTGGATTGTCTATGTGTCTT  
 TGCTTCTGTGCTGCTGATGCTCTGCCCTGTGCTGACATGACCTCCCTGGCAGTGGCACAACCTGGAGCTGGGTGGAGGCCCGTGACCTTCAGACCTTGGC  
 ACTGGAGGTGG

#### ➤ Exon14 of wild-type human pendrin

(Expected size of the PCR product: 190+70 = 260-bp)

CCTGGCCTGCCAGGCTTTTGTCAACAGCACCTTTGTGGTTCTCACTTGGTGGAAAGCTCTCTACCTGGTGTGTGGGAGCGTGGATTCTTCTACACACC  
 CATGTCCC GCCGGAAGTGGAGGACCCACAAGGTAAGCTCTGCTCCTGAATTAATTCATCCCAAGTGTCAACTACCCTGTTTGTCTTTACCCCTTGAG  
 ACCTTGTAATTTGTGCCCTAGGTGTGGAGGGTCTCAGGCTAACCCAGTGGGGGGCACATTTCTGTGGGCAGCTAGACATATGTAACATGGTAGCTGCCA  
 GGAAGGAGTGAGAATCCTTCCTTAAGTCTCCTAGGTGGTGACGGGTGGCTAGGCCCCAGGATAGGTACCGGGCCCCCCCCTCAGAGTTAGCTACAGGAAA  
 ATGTCATCTGCAATAAAGACAGAGTCCAAAACACCAGAATGATGGGCTCTTTAGTAGCTGTTGTTTTTAACTTTTTATTCCAAAATACGGCTGTTCCAA  
 AAAATCTTGACCTTGATATTTTTTCTCTAGTCCCTTCTGGAAATGGCCTTGGAAAGCATCCCTAGCACAGATATCTACAAAAGTACCAAGAATTACAAA  
 ACCTAAGTACCTTTGTGAGACATTTGTCTGGACTTGGGTTTACTAGCCTGAAGTTTCAGCAGCTCCATTTTACGTACAAGGTAGCCAAAGGGAGAAAATG  
 CCTATTGGGAAAGTCTGTTAGTCCACAGGGAGTGTATGAAAACCTTTGATCCTCGAGGTCGACGGTATCGATAAGCTAATTCCTGCAGCCCGGGGGAT  
 CCACCTAGTTC TAGAGCGGCCGCCACCCGGTGGAGCTCGGTACCTATTTGGGGACCCCATAGAGCACTGCCTGACTGAGGGATGGTAAACAGGATGTGT  
 AGGTTTTGGAGGCCATATGTCCATTCATGACCAGTACTTGTCTCACAGCCATGCAACCCCTGCCTCCTGTGCTGACTTAGCAGGGGATAAAGTGAGA  
 GAAAGCCTGGGCTAATCAGGGGGTCTGCTCAGCTCCTCCTAACTGGATTGTCTATGTGTCTTTGCTTCTGTGCTGCTGATGCTCTGCCCTGTGCTGACA  
 TGACCTCCCTGGCAGTGGCACAACCTGGAGCTGGGTGGAGGCCCGTGACCTTCAGACCTTGGCACTGGAGGTGG

#### ➤ Exon15 of wild-type human pendrin

(Expected size of the PCR product: 190+93 = 283-bp)

CCTGGCCTGCCAGGCTTTTGTCAACAGCACCTTTGTGGTTCTCACTTGGTGGAAAGCTCTCTACCTGGTGTGTGGGAGCGTGGATTCTTCTACACACC  
 CATGTCCC GCCGGAAGTGGAGGACCCACAAGGTAAGCTCTGCTCCTGAATTAATTCATCCCAAGTGTCAACTACCCTGTTTGTCTTTACCCCTTGAG  
 ACCTTGTAATTTGTGCCCTAGGTGTGGAGGGTCTCAGGCTAACCCAGTGGGGGGCACATTTCTGTGGGCAGCTAGACATATGTAACATGGTAGCTGCCA  
 GGAAGGAGTGAGAATCCTTCCTTAAGTCTCCTAGGTGGTGACGGGTGGCTAGGCCCCAGGATAGGTACCGGGCCCCCCCCAGAAAAGAAAAGAAAGTTGA  
 GTGCTGTACCCAGCTCCTCTGAGCAACTGTGACTTGACTCCTTGTAGTAGCCAGAATGTAATFAAATACTTGAGGCTTGAAATATTTAATCCCA  
 GACAAATTTCTTTAATGCCAGATTGAAGAACCTCAAGGAGTGAAGATTCTTAGATTTTCCAGTCCATTTTCTATGGCAATGTGATGGTTTTAAAAAA  
 TGTATCAAGTCCACA GTAAGTATTTTATCCCTAGAAAATTTGTTTTCTAACCTCTTTTGAGACTTCATTCATTCTACAAGTATTTACTGGGGTCCAAATCA  
 GGAATAGGCCCTAGACCTCTTCCCTTTGTGTAGGGCAATGAGAATFAAATAAATACATCTTGGCTCGAGGTCGACGGTATCGATAAGCTAATTCCTG  
 CAGCCCGGGGGATCCACTAGTTCTAGAGCGGCCGCCACCCGGTGGAGCTCGGTACCTATTTGGGGACCCCATAGAGCACTGCCTGACTGAGGGATGG  
 TAACAGGATGTGTAGGTTTTGGAGGCCATATGTCCATTCATGACCAGTACTTGTCTCACAGCCATGCAACCCCTGCCTCCTGTGCTGACTTAGCAGG  
 GGATAAAGTGAGAGAAAGCCTGGGCTAATCAGGGGGTCTGCTCAGCTCCTCCTAACTGGATTGTCTATGTGTCTTTGCTTCTGTGCTGCTGATGCTCTG  
 CCCTGTGCTGACATGACCTCCCTGGCAGTGGCACAACCTGGAGCTGGGTGGAGGCCCGTGACCTTCAGACCTTGGCACTGGAGGTGG

#### ➤ Exon16 of wild-type human pendrin

(Expected size of the PCR product: 190+96 = 286-bp)

CCTGGCCTGCCAGGCTTTTGTCAACAGCACCTTTGTGGTTCTCACTTGGTGGAAAGCTCTCTACCTGGTGTGTGGGAGCGTGGATTCTTCTACACACC  
 CATGTCCC GCCGGAAGTGGAGGACCCACAAGGTAAGCTCTGCTCCTGAATTAATTCATCCCAAGTGTCAACTACCCTGTTTGTCTTTACCCCTTGAG  
 ACCTTGTAATTTGTGCCCTAGGTGTGGAGGGTCTCAGGCTAACCCAGTGGGGGGCACATTTCTGTGGGCAGCTAGACATATGTAACATGGTAGCTGCCA  
 GGAAGGAGTGAGAATCCTTCCTTAAGTCTCCTAGGTGGTGACGGGTGGCTAGGCCCCAGGATAGGTACCGGGCCCCCCCCAGATCTACTCCATCAGACCT  
 TACAATTTCTTTTTTGGCAGGATAGCTCAAGGAATATACCCTTTGAGAAAATAGCCTTTCCAGATAACAGTTGCCATTAATAAGCTTTAGGTGCCAGGC  
 ATTTTAAGTAACCTTGACATTTATTTCCAAAAGGTTGGATTGATGCCATTAGAGTATATAAAGAGGCTGAAAGCCTGAGGAAAATACAGAACTAAT  
 AAAAGTGGACAATTAAGAGCAACAAGGTGAGATGACATCTTTCTTTCCCTTAAATTTCTTTTCCCTTGATGAGAGCAGTTAGAGGGTCTAAA  
 ATTAATCTATCTCTTTAGTATCCAGATGTGAATGAACAAATGACATGTACGTATCAAGAACAACCTGAGCTATTTCTTCGAGGTGCAGCGTATCGAT  
 AAGCTAATTCCTGCAGCCCGGGGGATCCACTAGTTCTAGAGCGGCCGCCACCCGGTGGAGCTCGGTACCTATTTGGGGACCCCATAGAGCACTGCCT  
 GACTGAGGGATGGTAAACAGGATGTGTAGGTTTTGGAGGCCATATGTCCATTCATGACCAGTACTTGTCTCACAGCCATGCAACCCCTGCCTCCTGTG  
 CTGACTTAGCAGGGGATAAAGTGAGAGAAAGCCTGGGCTAATCAGGGGGTCTGCTCAGCTCCTCCTAACTGGATTGTCTATGTGTCTTTGCTTCTGTGCT  
 TGCTGATGCTCTGCCCTGTGCTGACATGACCTCCCTGGCAGTGGCACAACCTGGAGCTGGGTGGAGGCCCGTGACCTTCAGACCTTGGCACTGGAGGTGG

#### ➤ Exon17 of wild-type human pendrin

(Expected size of the PCR product: 190+231 = 421-bp)

CCTGGCCTGCCAGGCTTTTGTCAACAGCACCTTTGTGGTTCTCACTTGGTGGAAAGCTCTCTACCTGGTGTGTGGGAGCGTGGATTCTTCTACACACC  
 CATGTCCC GCCGGAAGTGGAGGACCCACAAGGTAAGCTCTGCTCCTGAATTAATTCATCCCAAGTGTCAACTACCCTGTTTGTCTTTACCCCTTGAG  
 ACCTTGTAATTTGTGCCCTAGGTGTGGAGGGTCTCAGGCTAACCCAGTGGGGGGCACATTTCTGTGGGCAGCTAGACATATGTAACATGGTAGCTGCCA  
 GGAAGGAGTGAGAATCCTTCCTTAAGTCTCCTAGGTGGTGACGGGTGGCTAGGCCCCAGGATAGGTACCGGGCCCCCCCCGGGCTGAGGTGAAACCCATC  
 CTTAAAATTCATCTCCTTGATGTCTGTCTTACCAAGGAACAGTGTGTAGGCTTTTTGGATAATTTGATATGAATGGTTGAAAGATTTCAAATCTTTGA  
 CAATTAAGTTGACAGTGTCTTTCTCGTTTGAATGGCATCATAAGTGATGCTGTTTCAACAAATAATGCTTTTGGAGCTGATGAGGATATTGAAGATCT  
 GGAGGACTTGATCTCCCAAGCAAGGAAATAGAGATTCAGTGGATTGGAACCTGAGCTTCCAGTCAAAGTGAACGTTCCAAAGTGCACATCCATCA  
 CCTTTGACTTACTGATCTGGAGCTATATCTTCTGAGCTTGTGGAGTGTGAGTCTGCGGGTGTAAAGTTCTGGTTTCTGAATATACATTTGGAG  
 CTTTTGCAATAGTAAAATGATGTGGTTGTCCAGTATTGCAACAGGGCAAATACATGGGCTTTTGTAAATTTTCTAGGTGAATGCTTTTGTAAAAAAGTG  
 TAATATTTTAAAGCATTCGAGGTCGACGGTATCGATAAGCTAATTCCTGCAGCCCGGGGGATCCACTAGTTCTAGAGCGGCCGCCACCCGGTGGAGCT



CGGTACCTATTTGGGGACCCCATAGAGCACTGCACTGACTGAGGGATGGTAACAGGATGTGTAGGTTTTGGAGGCCATATGTCCATTCATGACCAGTG  
 ACTTGTCTCACAGCCATGCAACCCTTGCCCTCCTGTGCTGACTTAGCAGGGGATAAAGTGAGAGAAAGCCTGGGCTAATCAGGGGGTCGCTCAGCTCCTC  
 CTAACGGATTGTCTATGTGTCTTTGCTTCTGTGCTGCTGATGCTCTGCCCTGTGCTGACATGACCTCCCTGGCAGTGGCACAACCTGGAGCTGGGTGG  
 AGGCCCGTGACCTTCAGACCTTGGCACTGGAGGTGG

➤ **Exon18 of wild-type human pendrin**

(Expected size of the PCR product: 190+55 = 245-bp)

CCTGGCCTGCCAGGCTTTTGTCAACAGCACCTTTGTGGTTCTCACTTGGTGGAAAGCTCTCTACCTGGTGTGTGGGGAGCGTGGATTCTTCTACACACC  
 CATGTCCC GCCGCGAAGTGGAGGACCACAAGGTAAGCTCTGCTCCTGAATTAATCTATCCCAAGTGCTAACTACCCTGTTTGTCTTTCACCCCTTGAG  
 ACCTTGTAAATTGTGCCCTAGGTGTGGAGGGTCTCAGGCTAACAGTGGGGGGCACATTTCTGTGGGCAGCTAGACATATGTAAACATGGTAGCTGCCA  
 GGAAGGAGTGAGAATCCTTCCTTAAGTCTCCTAGGTGGTGACGGGTGGCTAGGCCCCAGGATAGGTACCGGGCCCCCCCCACCTCCATGGTTTTGCAATA  
 ATAACCTTTCCTTAAAGTCTGATTAACCATGAAAGTAATAATGTTTCTCCTGAGCAAGTAACCTGAATGCTACTGAATTATGGGCAGATAAGGTTGTTA  
 ATTGTTACAAACTCTCCTTTTTTATTTTTAGATTGTCAAAAGAATCCAAAGAATTGATGTGAATGTGATTTTTGCAATCACTTCAAGGTAAATACATATA  
 TCTACATATCTACCTGAAGACTTTCCCGTAAGCCCTTCTCCTATCTGGGACTGFGGTACATTTATGTCTGAAGGCCCTTTTTTTTTTTCTTTTAAAG  
 ATCTCAATTGTCATTATTGTCAGTTCGGAATCTGGCATCGAGGTGACGGTATCGATAAGCTAATTCCTGCAGCCGGGGGATCCACTAGTTCTAGAG  
 CGGCCGCCACCGCGGTGGAGCTCGGTACCTATTTGGGGACCCCATAGAGCACTGCACTGACTGAGGGATGGTAACAGGATGTGTAGGTTTTGGAGGCC  
 ATATGTCCATTCATGACCAGTGACTTGTCTCACAGCCATGCAACCCTTGCCCTCCTGTGCTGACTTAGCAGGGGATAAAGTGAGAGAAAGCCTGGGCTAA  
 TCAGGGGGTCGCTCAGCTCCTCCTAAGTGGATTGTCTATGTGTCTTTGCTTCTGTGCTGCTGATGCTCTGCCCTGTGCTGACATGACCTCCCTGGCAG  
 TGGCACAACCTGGAGCTGGGTGGAGGCCCGTGACCTTCAGACCTTGGCACTGGAGGTGG

➤ **Exon19 of wild-type human pendrin**

(Expected size of the PCR product: 190+146 = 336-bp)

CCTGGCCTGCCAGGCTTTTGTCAACAGCACCTTTGTGGTTCTCACTTGGTGGAAAGCTCTCTACCTGGTGTGTGGGGAGCGTGGATTCTTCTACACACC  
 CATGTCCC GCCGCGAAGTGGAGGACCACAAGGTAAGCTCTGCTCCTGAATTAATCTATCCCAAGTGCTAACTACCCTGTTTGTCTTTCACCCCTTGAG  
 ACCTTGTAAATTGTGCCCTAGGTGTGGAGGGTCTCAGGCTAACAGTGGGGGGCACATTTCTGTGGGCAGCTAGACATATGTAAACATGGTAGCTGCCA  
 GGAAGGAGTGAGAATCCTTCCTTAAGTCTCCTAGGTGGTGACGGGTGGCTAGGCCCCAGGATAGGTACCGGGCCCCCCCCGGGGATCACTTGAACCTGGG  
 ACGCGGAGGTTGCAGTGAGCAATGATGCCACTGCCTCCAGCCTGGGCAATAGAAATGAGACTCTGTCTCAAAAACAAAACAAAATTTCTTTTCTAGGA  
 ACTAACAAAACATTTGTGTCTTTCTTTTGAAGATTATGTGATAGAAAAGCTGGAGCAATGCGGGTCTTTGACGACAACATTAGAAAGGACACATTCCTT  
 TTGACGGTCCATGATGCTATCTATCTACAGAACAAGTGAATCTCAAGAGGGTCAAGGTTCCATTTAGAAACGTAATAATTC AACCTTTCTAC  
 AGATGTATCTTTTCTAAACTATCATGATTTCTATAAATGGCAAACATTACACAAGTCTAGTCTAGCTGTTGAATTTTAAAGCTACCATATAAATTCATG  
 GAGCCTCAGTTTTTTTCATCAGTAAATGGAATCGAGGTGACGGTATCGATAAGCTAATTCCTGCAGCCGGGGGATCCACTAGTTCTAGAGCGGCCGCC  
 ACCGCGGTGGAGCTCGGTACCTATTTGGGGACCCCATAGAGCACTGCACTGACTGAGGGATGGTAACAGGATGTGTAGGTTTTGGAGGCCCATATGTCC  
 ATTCATGACCAGTGACTTGTCTCACAGCCATGCAACCCTTGCCCTCCTGTGCTGACTTAGCAGGGGATAAAGTGAGAGAAAGCCTGGGCTAATCAGGGGG  
 TCGCTCAGCTCCTCCTAAGTGGATTGTCTATGTGTCTTTGCTTCTGTGCTGCTGATGCTCTGCCCTGTGCTGACATGACCTCCCTGGCAGTGGCACAA  
 CTGGAGCTGGGTGGAGGCCCGTGACCTTCAGACCTTGGCACTGGAGGTGG

Supp. Table S1. SLC26A4 genotype and clinical phenotype of subjects.

| Pedigree No. | individual ID | Age at genetic test | Relationship                     | Amino acid change on Allele 1 | Amino acid change on Allele 2 | Hearing loss | Onset age of hearing loss (y) | EVA        | PTA                | DP-OAE      | ABR                        | ASSR    | COR                | Goiter               |
|--------------|---------------|---------------------|----------------------------------|-------------------------------|-------------------------------|--------------|-------------------------------|------------|--------------------|-------------|----------------------------|---------|--------------------|----------------------|
| 867          | 1             | 16                  | Proband                          | Y214C                         | H723R                         | Yes          | 0                             | Yes        | Moderate-to-severe | No response | -                          | -       | -                  | No                   |
|              | 2             | -                   | Father                           | =                             | H723R                         | No           | -                             | -          | -                  | -           | -                          | -       | -                  | -                    |
|              | 3             | -                   | Mother                           | Y214C                         | =                             | No           | -                             | -          | -                  | -           | -                          | -       | -                  | -                    |
| 2467         | 4             | 24                  | Proband                          | Y214C                         | H723R                         | Yes          | 0                             | Yes        | Profound           | -           | -                          | -       | -                  | No                   |
|              | 5             | 61                  | Father                           | =                             | H723R                         | No           | -                             | -          | -                  | -           | -                          | -       | -                  | -                    |
|              | 6             | 57                  | Mother                           | Y214C                         | =                             | No           | -                             | -          | -                  | -           | -                          | -       | -                  | -                    |
| 2518         | 7             | 6                   | Proband                          | Y214C                         | H723R                         | Yes          | 0                             | Yes        | Moderate           | -           | -                          | -       | -                  | No                   |
| 1936         | 8             | 1                   | Proband                          | T410K                         | L703P                         | Yes          | 0                             | Yes        | -                  | -           | No response to 100dB click | -       | Moderate to severe | No                   |
|              | 9             | -                   | Father                           | T410K                         | =                             | No           | -                             | -          | -                  | -           | -                          | -       | -                  | -                    |
|              | 10            | -                   | Mother                           | =                             | L703P                         | No           | -                             | -          | -                  | -           | -                          | -       | -                  | -                    |
| 1130         | 11            | 1                   | Proband                          | L703P                         | S551Ffs*13                    | Yes          | 0                             | Yes        | -                  | -           | Mild/moderate              | -       | Moderate           | No                   |
|              | 12            | 4                   | Brother                          | L703P                         | H723R                         | Yes          | 0                             | Yes        | Severe             | -           | -                          | -       | -                  | No                   |
|              | 13            | -                   | Father                           | L703P                         | H723R                         | Yes          | 0                             | -          | Profound           | -           | -                          | -       | -                  | Yes, found at 25y.o. |
|              | 14            | -                   | Mother                           | H723R                         | S551Ffs*13                    | Yes          | 0                             | -          | Profound           | -           | -                          | -       | -                  | Yes, found at 12y.o. |
|              | 15            | 36                  | Father's sister                  | L703P                         | H723R                         | Yes          | 0                             | Yes        | Profound           | -           | -                          | -       | -                  | Yes, found at 31y.o. |
|              | 16            | 36                  | (11 and 12 are identical twins.) | L703P                         | H723R                         | Yes          | 0                             | Yes        | Profound           | -           | -                          | -       | -                  | Yes, found at 31y.o. |
| 2345         | 17            | 27                  | Proband                          | L703P                         | H723R                         | Yes          | 0                             | Yes        | Profound           | No response | No response to 90dB click  | -       | -                  | Yes, found at 22y.o. |
| 2208         | 18            | 41                  | Proband                          | L703P                         | H723R                         | Yes          | 0                             | Yes        | Severe             | -           | -                          | -       | -                  | No                   |
| 873          | 19            | 7                   | Proband                          | V483E                         | =                             | Yes          | 7                             | Borderline | Mild               | Normal      | Response to 30dB click     | 40~50dB | -                  | Yes (mild)           |

EVA, Enlarged Vestibular Aqueduct  
PTA, Pure Tone Audiometry  
DP-OAE, Distortion Product Otoacoustic Emission  
ABR, Auditory Brainstem Response  
ASSR, Auditory Steady State Response  
COR, Conditioned Orientation Reflex audiometry  
=, not detected  
-, not available

**Supp. Table S2.** A summary of novel pendrin missense variants.

| Genome position (hg19) | Exon    | Nucleotide change (NM_000441) | Amino acid change | dbSNP150 | 1000genomes _east_asia | gnomAD_ex_ome_ALL | HGVD     | iJGVD3.5K | CADD | REVEL |
|------------------------|---------|-------------------------------|-------------------|----------|------------------------|-------------------|----------|-----------|------|-------|
| chr7:107315430         | Exon 6  | c.641A>G                      | p.Y214C           | none     | none                   | none              | 0.000826 | none      | 28.6 | 0.969 |
| chr7:107330648         | Exon 10 | c.1229C>A                     | p.T410K           | none     | none                   | none              | none     | none      | 27.1 | 0.901 |
| chr7:107336388         | Exon 13 | c.1448T>A                     | p.V483E           | none     | none                   | none              | none     | none      | 26.7 | 0.932 |
| chr7:107350517         | Exon 19 | c.2108T>C                     | p.L703P           | none     | none                   | none              | none     | none      | 31   | 0.925 |

dbSNP, The Single Nucleotide Polymorphism Database  
1000genomes, The 1000 genomes project  
gnomAD, The Genome Aggregation Database  
HGVD, Human Genetic Variation Database  
iJGVD, Integrative Japanese Genome Variation Database  
CADD, Combined Annotation Dependent Depletion (v1.4)  
REVEL, Rare Exome Variant Ensemble Learner

**Supp. Table S3.** A summary of HCO<sub>3</sub><sup>-</sup>/Cl<sup>-</sup> antiport activities measured under a high Cl<sup>-</sup> condition (1 µg/mL doxycycline).

|                | mean ± SD (n)    |                | mean ± SD (n)   |                | mean ± SD (n)   |                | mean ± SD (n)   |
|----------------|------------------|----------------|-----------------|----------------|-----------------|----------------|-----------------|
| <b>WT</b>      | 2.58 ± 0.79 (15) | <b>p.V163I</b> | 1.88 ± 0.21 (3) | <b>p.S399P</b> | 2.08 ± 0.19 (3) | <b>p.T527P</b> | 0.73 ± 0.26 (4) |
| <b>p.S28G</b>  | 0.89 ± 0.31 (4)  | <b>p.V186F</b> | 0.37 ± 0.11 (3) | <b>p.S408F</b> | 0.31 ± 0.11 (3) | <b>p.I529S</b> | 0.61 ± 0.26 (5) |
| <b>p.S49R</b>  | 2.46 ± 0.86 (4)  | <b>p.T193I</b> | 0.37 ± 0.08 (3) | <b>p.R409H</b> | 0.34 ± 0.03 (3) | <b>p.Y556C</b> | 0.40 ± 0.02 (3) |
| <b>p.P76S</b>  | 0.54 ± 0.16 (4)  | <b>p.Y214C</b> | 1.10 ± 0.38 (5) | <b>p.T410K</b> | 0.26 ± 0.02 (3) | <b>p.C565Y</b> | 1.68 ± 0.55 (5) |
| <b>p.S90L</b>  | 0.26 ± 0.05 (3)  | <b>p.V239D</b> | 0.36 ± 0.05 (4) | <b>p.T410M</b> | 0.30 ± 0.04 (3) | <b>p.S657N</b> | 0.80 ± 0.10 (4) |
| <b>p.T99R</b>  | 0.23 ± 0.03 (3)  | <b>p.D266N</b> | 2.49 ± 0.66 (3) | <b>p.T416P</b> | 0.35 ± 0.14 (3) | <b>p.V659L</b> | 1.11 ± 0.07 (5) |
| <b>p.L117F</b> | 2.08 ± 0.44 (8)  | <b>p.T307A</b> | 2.05 ± 0.08 (4) | <b>p.Q421L</b> | 0.46 ± 0.02 (3) | <b>p.S666F</b> | 0.56 ± 0.12 (4) |
| <b>p.P123S</b> | 0.25 ± 0.01 (3)  | <b>p.N324Y</b> | 2.23 ± 0.16 (3) | <b>p.I426N</b> | 1.10 ± 0.41 (3) | <b>p.D669E</b> | 0.37 ± 0.02 (3) |
| <b>p.G131V</b> | 0.26 ± 0.05 (3)  | <b>p.G334V</b> | 1.44 ± 0.14 (3) | <b>p.L445W</b> | 0.30 ± 0.09 (3) | <b>p.F683S</b> | 0.41 ± 0.06 (5) |
| <b>p.S133T</b> | 0.22 ± 0.06 (3)  | <b>p.F354S</b> | 1.80 ± 0.11 (3) | <b>p.N457K</b> | 0.94 ± 0.05 (3) | <b>p.F692L</b> | 1.03 ± 0.24 (5) |
| <b>p.G139A</b> | 0.31 ± 0.09 (3)  | <b>p.K369E</b> | 0.92 ± 0.34 (4) | <b>p.R470H</b> | 1.95 ± 0.38 (4) | <b>p.L703P</b> | 0.37 ± 0.02 (3) |
| <b>p.M147T</b> | 0.41 ± 0.12 (4)  | <b>p.A372V</b> | 0.28 ± 0.04 (3) | <b>p.V483E</b> | 1.16 ± 0.50 (5) | <b>p.T721M</b> | 0.36 ± 0.02 (3) |
| <b>p.M147V</b> | 0.48 ± 0.11 (3)  | <b>p.N392Y</b> | 0.21 ± 0.02 (3) | <b>p.G497S</b> | 0.70 ± 0.23 (4) | <b>p.H723R</b> | 0.58 ± 0.11 (4) |
